# Supplementary material for: 430 脳卒中片麻痺の肩関節 : 肩甲上腕リズムと肩関節可動域について
Source: MDPI journal article supplement (doi:10.3390/jcm10194328), 2001-04-20
Supplement: s1 [file s1]

# **Supplementary Material**

**The role of Urinary Biomarkers in Cirrhotic Patients with Acute Kidney Injury:**

**Multicenter, Prospective Cohort Study**

Jeong-Ju Yoo, Jung Hyun Kwon, Young Seok Kim, Soon Woo Nam, Ji Won Park, Hee Yeon Kim, Chang Wook Kim, Seung Kak Shin, Young Eun Chon, Eun-Sun Jang, Sook-Hyang Jeong, Jin Woo Lee, Do Seon Song, Jin Mo Yang, Sung Won Lee, Hae Lim Lee, Young Kul Jung, Hyung Joon Yim, Sang Gyune Kim, Ju Hyun Kim

## **Table of Contents**

### **I. Supplementary**

**Tables.....13**

### **II. Supplementary**

**Figures.....17**

## I. Supplementary Tables

**Supplementary Table S1. Logistic regression analysis for AKI recurrence in patients with AKI**

| Variable                         | Univariable         |              | Multivariable       |         |
|----------------------------------|---------------------|--------------|---------------------|---------|
|                                  | HR (95% CI)         | p-value      | HR (95% CI)         | p-value |
| Age (year)                       | 0.999 (0.984-1.014) | 0.896        | 1.004 (0.985-1.023) | 0.699   |
| Male (vs. female)                | 1.29 (0.821-2.026)  | 0.269        |                     |         |
| BMI (kg/m <sup>2</sup> )         | 1.027 (0.982-1.074) | 0.25         | 1.025 (0.993-1.058) | 0.130   |
| Viral etiology (vs. non-viral)   | 1.786 (1.015-3.143) | <b>0.044</b> |                     |         |
| Diabetes                         | 1.275 (0.832-1.954) | 0.265        |                     |         |
| Prior use of diuretics           | 0.971 (0.631-1.496) | 0.895        |                     |         |
| Prior use of beta blocker        | 0.93 (0.588-1.471)  | 0.756        |                     |         |
| Ascites                          | 0.932 (0.592-1.467) | 0.76         |                     |         |
| Hepatic encephalopathy           | 1.871 (1.105-3.169) | <b>0.02</b>  |                     |         |
| Child-pugh score                 | 1.082 (0.985-1.188) | 0.101        |                     |         |
| Child-pugh class B-C vs. class A | 1.713 (0.883-3.322) | 0.111        |                     |         |
| MELD score                       | 1.011 (0.987-1.035) | 0.375        |                     |         |
| Systolic blood pressure          | 0.997 (0.986-1.008) | 0.554        | 0.993 (0.984-1.001) | 0.102   |
| Diastolic blood pressure         | 0.996 (0.98-1.012)  | 0.626        |                     |         |
| Mean blood pressure              | 0.996 (0.981-1.011) | 0.574        |                     |         |
| Heart rate                       | 1.001 (0.992-1.011) | 0.786        |                     |         |
| WBC                              | 1 (1-1)             | 0.328        |                     |         |
| Hemoglobin                       | 0.977 (0.896-1.066) | 0.604        |                     |         |
| Platelet                         | 0.999 (0.996-1.003) | 0.771        |                     |         |
| Hs-CRP                           | 1.07 (1.018-1.124)  | <b>0.007</b> |                     |         |
| Albumin                          | 0.884 (0.648-1.207) | 0.439        |                     |         |
| BUN                              | 1.01 (1-1.02)       | <b>0.04</b>  |                     |         |
| Total bilirubin                  | 0.988 (0.964-1.011) | 0.3          |                     |         |
| AST                              | 1.001 (1-1.002)     | 0.201        |                     |         |
| ALT                              | 1.004 (1.002-1.006) | <b>0.001</b> |                     |         |
| Serum sodium                     | 0.96 (0.927-0.995)  | <b>0.025</b> |                     |         |
| Creatinine                       | 0.911 (0.503-1.652) | 0.759        |                     |         |
| Prothrombin time (INR)           | 1.278 (0.938-1.741) | 0.12         |                     |         |
| Urine NAG                        | 0.995 (0.987-1.003) | 0.223        |                     |         |

**Supplementary Table S2. Urine NAG depending upon liver disease severity**

| Category                     | Variable  | In 90 days          |                    |              |
|------------------------------|-----------|---------------------|--------------------|--------------|
|                              |           | LT/Death            | Alive              | p-value      |
| Total                        | N         | 95                  | 167                |              |
|                              | urine NAG | 14.19 (9.79-20.56)  | 8.08 (6.08-10.76)  | <b>0.005</b> |
| MELD < 24                    | N         | 20                  | 107                |              |
|                              | urine NAG | 8.8 (2.51-30.86)    | 5.5 (3.92-7.72)    | <b>0.044</b> |
| MELD ≥ 24                    | N         | 75                  | 60                 |              |
|                              | urine NAG | 16.11 (11.38-22.82) | 16.06 (9.92-26.01) | 0.69         |
| Ascites : none to mild       | N         | 37                  | 94                 |              |
|                              | urine NAG | 14.05 (8.69-22.74)  | 5.68 (3.76-8.58)   | <b>0.012</b> |
| Ascites : moderate to severe | N         | 58                  | 73                 |              |
|                              | urine NAG | 14.27 (8.35-24.39)  | 12.74 (8.86-18.33) | 0.253        |
| Child-pugh class : A and B   | N         | 14                  | 102                |              |
|                              | urine NAG | 9.06 (1.7-48.39)    | 5.42 (3.79-7.76)   | <b>0.018</b> |
| Child-pugh class : C         | N         | 81                  | 65                 |              |
|                              | urine NAG | 15.33 (10.82-21.72) | 15.14 (9.76-23.48) | 0.866        |

**Supplementary Table S3. Logistic regression analysis for response to terlipressin therapy in patients with HRS-AKI**

| Variable                 | Univariable         |              | Multivariable       |         |
|--------------------------|---------------------|--------------|---------------------|---------|
|                          | OR (95% CI)         | p-value      | OR (95% CI)         | p-value |
| Age (year)               | 0.982 (0.942-1.022) | 0.377        | 0.983 (0.941-1.025) | 0.414   |
| Male                     | 0.615 (0.233-1.596) | 0.32         |                     |         |
| BMI (kg/m <sup>2</sup> ) | 1.052 (0.939-1.183) | 0.384        |                     |         |
| Viral                    | 0.467 (0.132-1.485) | 0.21         |                     |         |
| DM                       | 0.309 (0.103-0.853) | <b>0.028</b> |                     |         |
| Use of Diuretic          | 1.35 (0.534-3.455)  | 0.527        |                     |         |
| Use of Beta blocker      | 1.956 (0.584-7.128) | 0.284        |                     |         |
| Ascites                  | 0.565 (0.181-1.68)  | 0.308        |                     |         |
| Hepatic encephalopathy   | 1.45 (0.545-3.924)  | 0.457        |                     |         |
| SBP                      | 0.989 (0.964-1.012) | 0.349        |                     |         |
| DBP                      | 0.999 (0.973-1.025) | 0.928        |                     |         |
| mean BP                  | 0.994 (0.967-1.021) | 0.68         |                     |         |
| Heart rate               | 0.983 (0.953-1.011) | 0.242        |                     |         |
| Urine NAG                | 0.998 (0.99-1.005)  | 0.63         | 0.996 (0.988-1.004) | 0.330   |
| WBC                      | 1 (1-1)             | 0.637        |                     |         |
| Hemoglobin               | 1.111 (0.892-1.402) | 0.353        |                     |         |
| Platelet                 | 0.999 (0.99-1.007)  | 0.801        |                     |         |
| Hs-CRP                   | 1.102 (0.986-1.271) | 0.122        |                     |         |
| Albumin                  | 0.871 (0.304-2.462) | 0.794        |                     |         |
| BUN                      | 1.004 (0.986-1.023) | 0.646        |                     |         |
| Total bilirubin          | 1.017 (0.976-1.06)  | 0.431        |                     |         |
| AST                      | 1.001 (0.998-1.004) | 0.637        |                     |         |
| ALT                      | 0.998 (0.992-1.001) | 0.445        |                     |         |
| serum-Na                 | 0.95 (0.882-1.018)  | 0.157        |                     |         |
| Creatinine               | 0.098 (0.017-0.377) | <b>0.003</b> |                     |         |
| PT (INR)                 | 1.064 (0.664-1.72)  | 0.791        |                     |         |
| CP score                 | 1.164 (0.945-1.453) | 0.162        |                     |         |
| CP class (B-C)           | 15216600.842 (0-NA) | 0.992        |                     |         |
| MELD score               | 1.042 (0.991-1.1)   | 0.116        | 1.045 (0.992-1.106) | 0.106   |

## II. Supplementary Figures

Supplementary Figure S1. Transplant free survival according to AKI phenotype

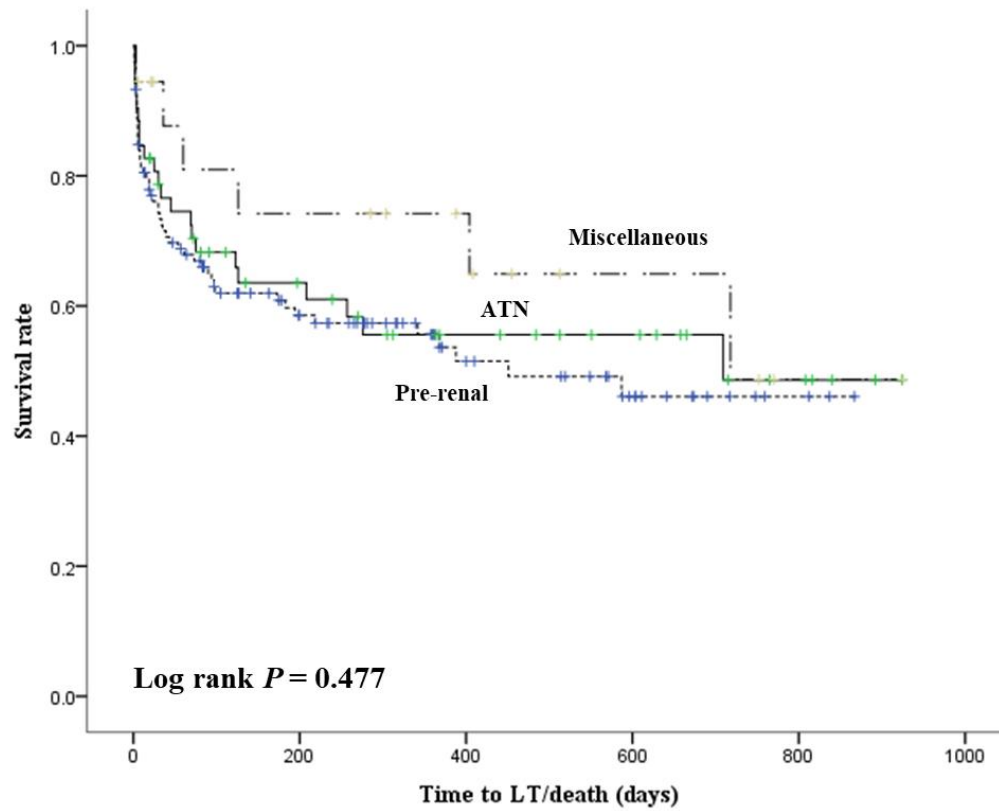

Supplementary Figure S2. Boxplot comparing mean urine NAG according to AKI recurrence

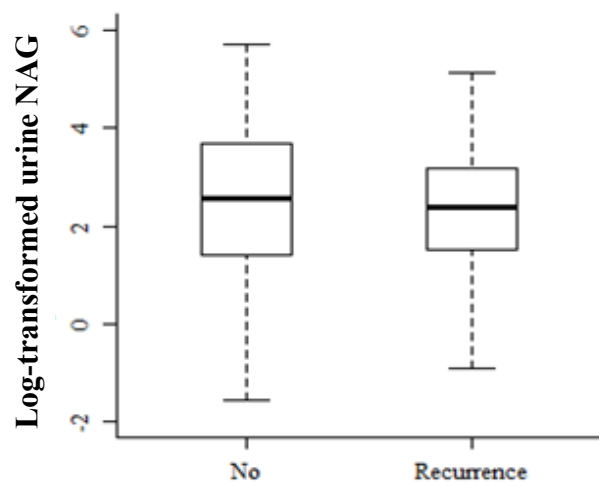

$P = 0.180$

Supplementary Figure S3. Urine NAG level according to clinical outcomes

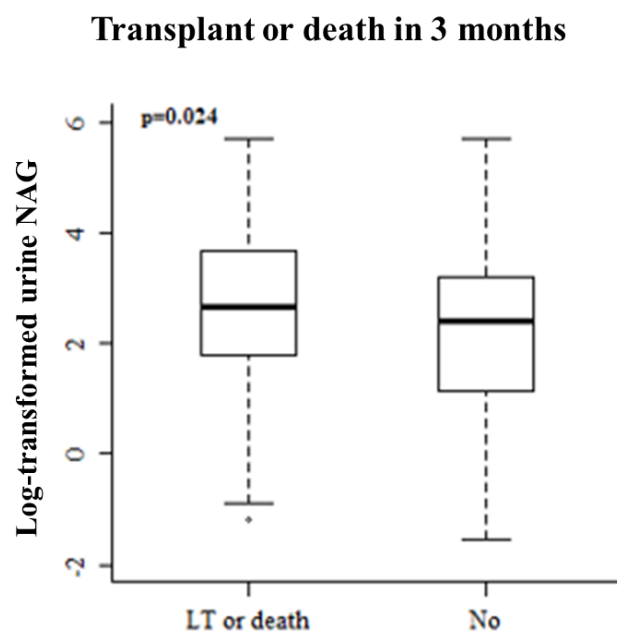

Urine NAG (mg/dL)

$38.80 \pm 55.90$

$22.34 \pm 36.73$

$P = 0.024$

Supplementary Figure S4. Boxplot comparing mean urine NAG between groups  
(HRS group)

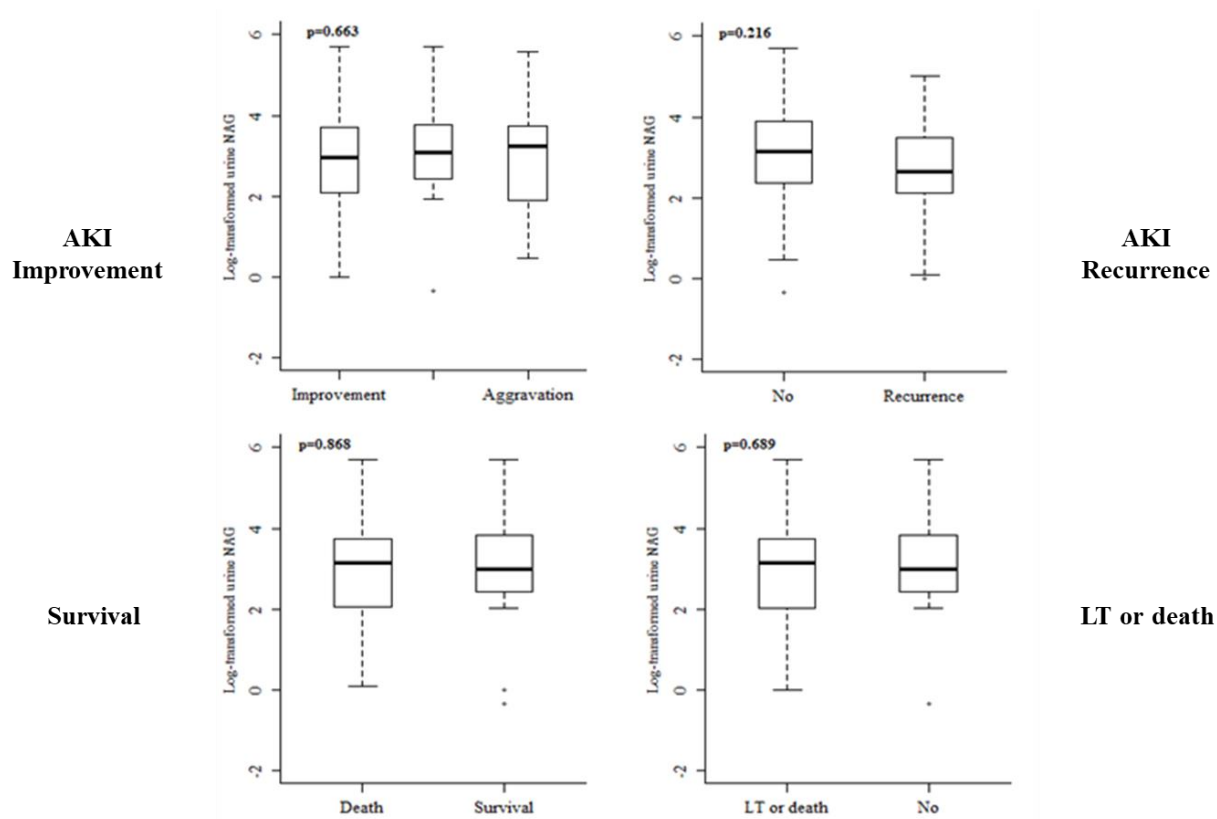



Supplementary Figure S5. Relationship between delta urine NAG and response to terlipressin

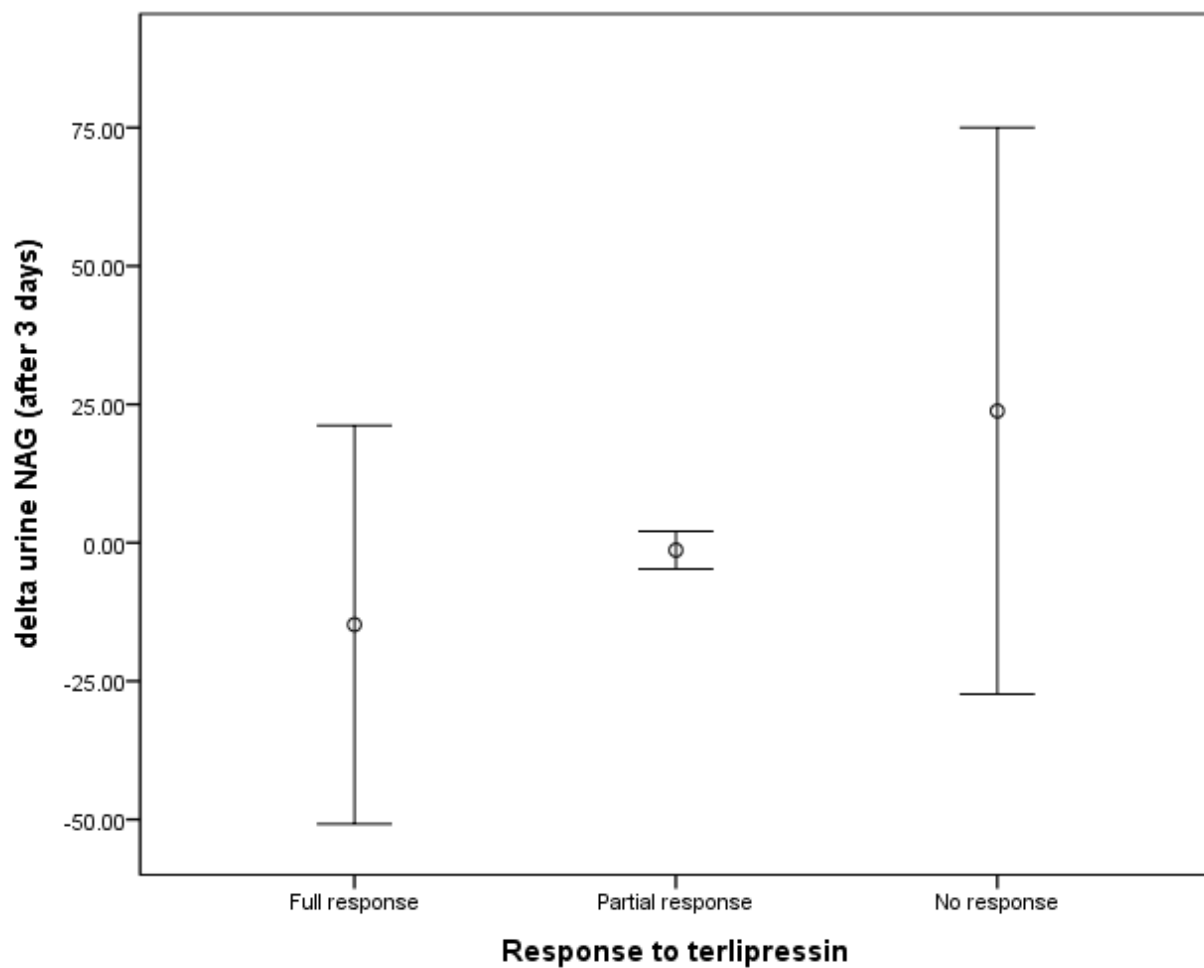

$P = 0.383$
